# Supplementary material
Source: Springer Nature journal article supplement (https://www.springermedizin.de/resource/supplementary/12906_2006_118_MOESM9_ESM.pdf/9524108)

—○— Estradiol alone    —●— Estradiol + ethanolic EU extract (50ng dry weight/ml treatment medium)

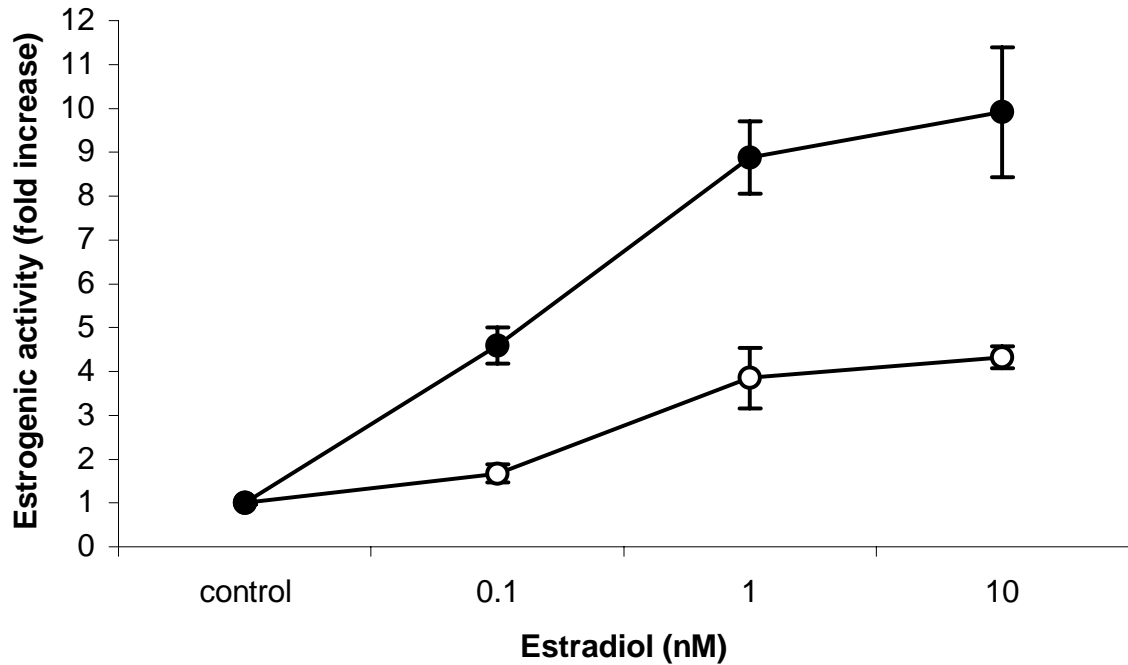

Supplement: MOESM9 [file 9524108]
